# Supplementary material
Source: Springer Nature journal article supplement (https://www.springermedizin.de/resource/supplementary/12891_2008_631_MOESM1_ESM.pdf/9506418)

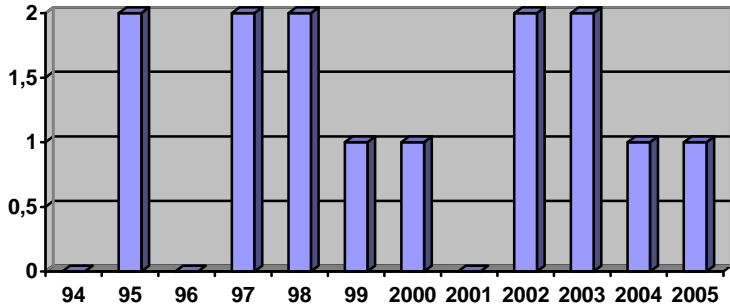

■ number of low grade B cell lymphoma

Supplement: MOESM1 [file 9506418]
